# Supplementary material for: Tibet plateau probiotic mitigates chromate toxicity in mice by alleviating oxidative stress in gut microbiota
Source: PubMed Central journal article supplement (PMC7229148; doi:10.1038/s42003-020-0968-3), 2020-05-15
Supplement: 42003_2020_968_MOESM1_ESM.pdf [file 42003_2020_968_MOESM1_ESM.pdf]

1 **Supplementary Information**

2

3 **Supplementary Figures**

4 **Supplementary Figure 1. a** Total chow consumption per mouse per day in the whole  
5 experiment. **b** Effect of Cr(VI) and probiotics on growth rate of mice. Values are  
6 mean± SEM (n=5 per group).

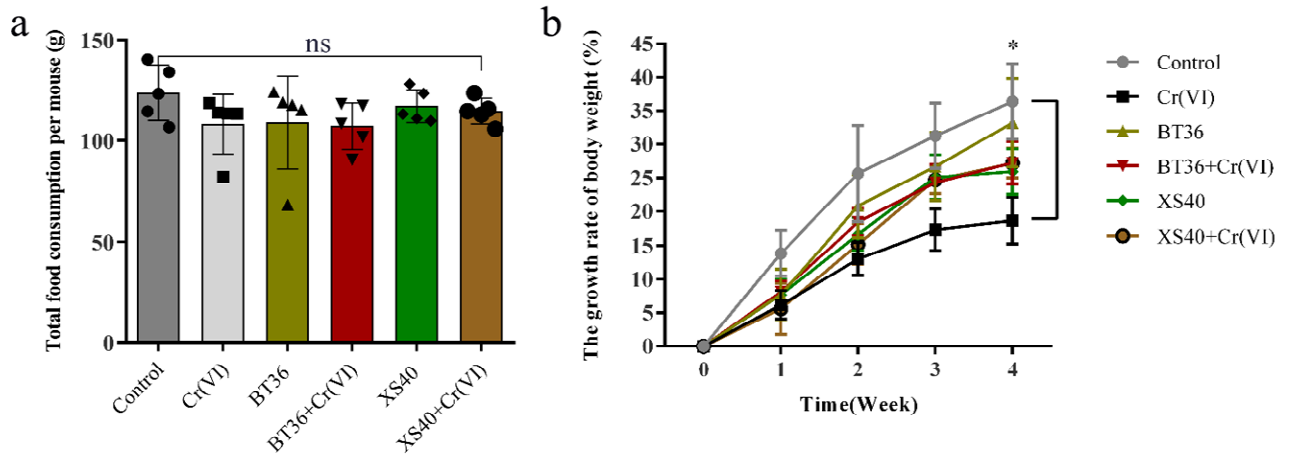

7

8

9

10

11

12

13

14

15

16

17

18

19

20  
21  
22  
23  
24  
25  
26  
27

**Supplementary Figure 2.** **a** The growth of multiple *Pediococcus acidilactici* at different concentration of hexavalent chromium. **b** The free radical scavenging capacity of BT36 and XS40. • OH, hydroxyl radical; DPPH, 1,1-Diphenyl-2-picrylhydrazyl radical 2,2-Diphenyl-1-(2,4,6-trinitrophenyl) hydrazyl radical.

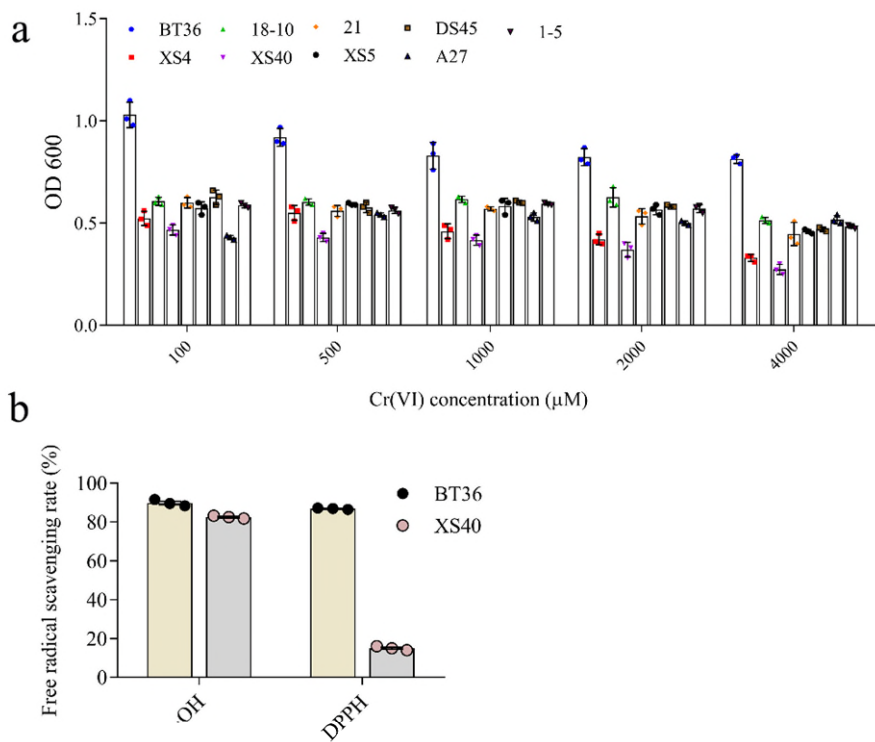

28  
29  
30  
31  
32  
33  
34  
35

36  
37  
38  
39  
40

**Supplementary Figure 3.** The sequence length distribution of four groups.

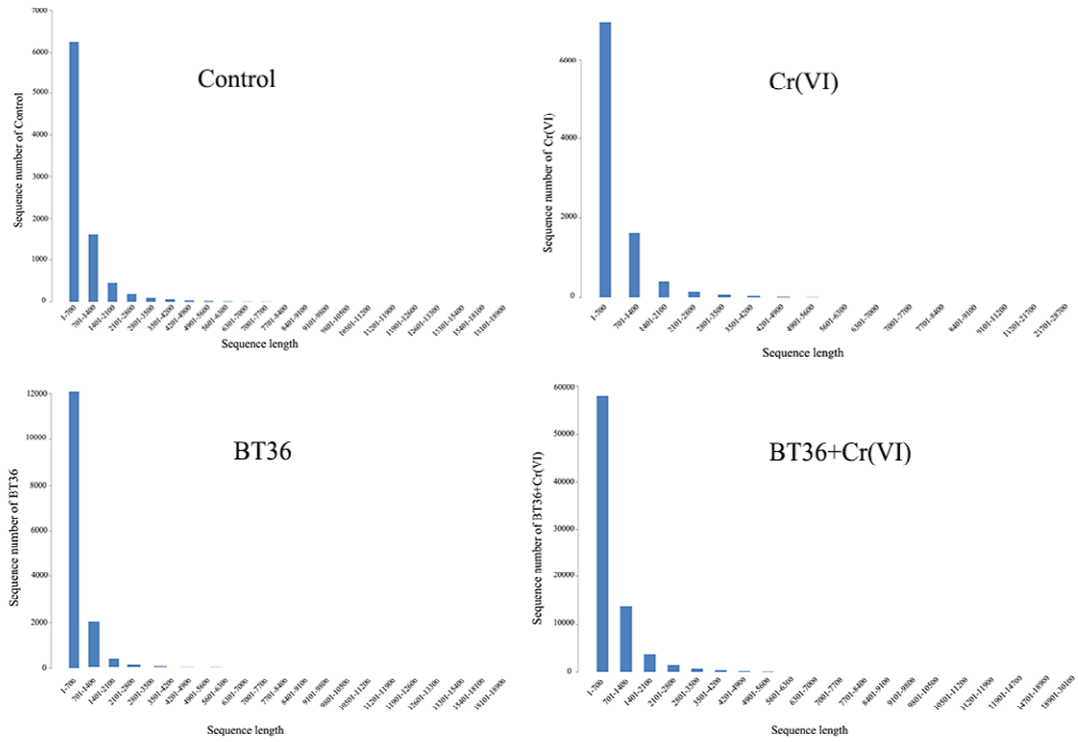

41  
42  
43  
44  
45  
46  
47  
48  
49  
50  
51  
52  
53  
54  
55  
56  
57

58  
59  
60  
61  
62  
63  
64  
65  
66

**Supplementary Figure 4.** The expression of the most important genes related to Cr(VI) reduction and antioxidation.

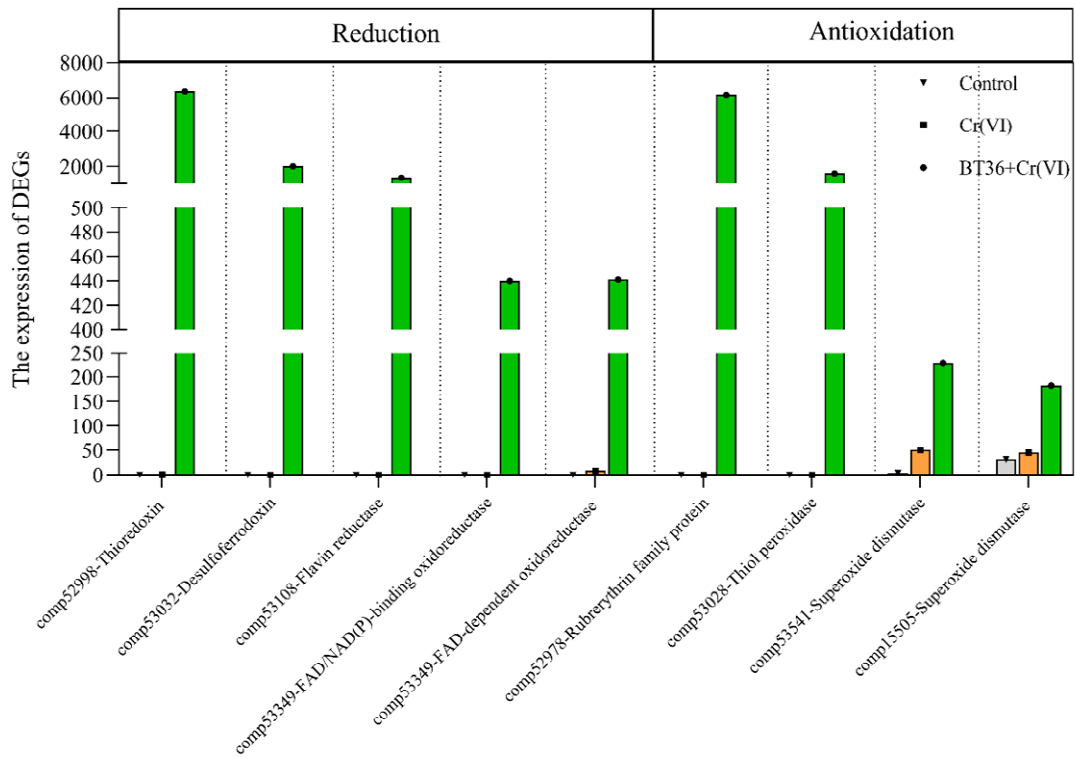

67  
68  
69  
70  
71  
72  
73  
74  
75  
76  
77  
78  
79  
80  
81  
82  
83

84

85

86

87

88 **Supplementary Figure 5.** qPCR analysis of the expression profiles of DEGs in the  
89 gut microbiota of mice (n=3 per group).

90

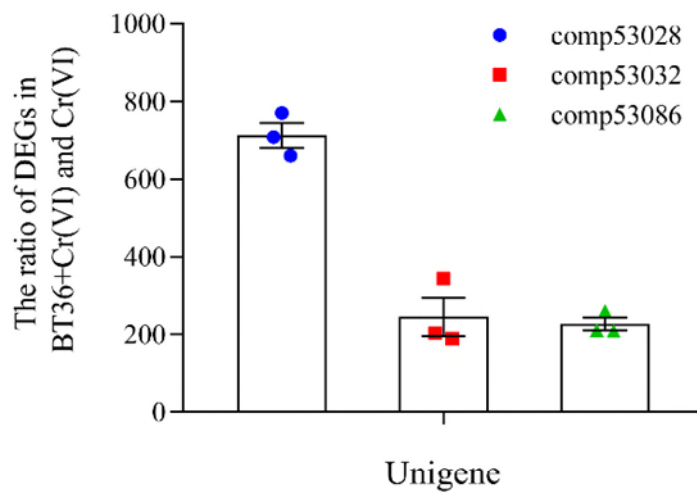

91

92

93 **Supplementary Figure 6.** The concentration of Cr content in the standard  
94 commercial rodent chow and the modified rodent chow with Cr(VI) added. Values are  
95 mean  $\pm$  SEM (n=3 per group).

96

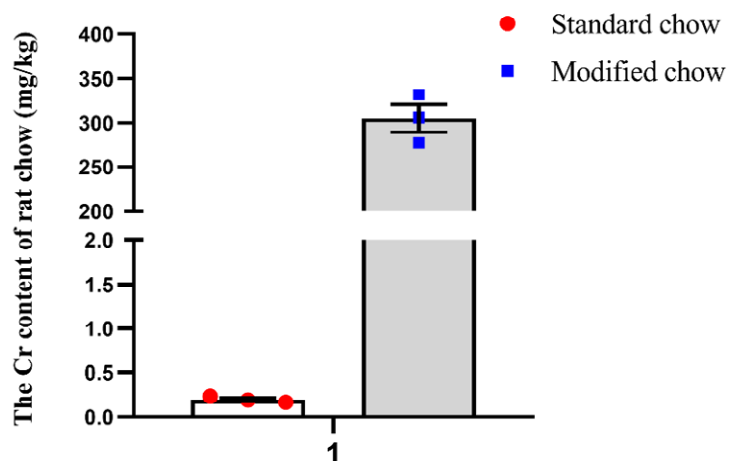

97

98

99

## Supplementary Tables

100

101

### Supplementary Table 1.

102

Biodiversity measures of total microbiota based on 16S rRNA sequencing.

103

104

| Sample ID     | Shannon | Chao1   | Observed | Simpson |
|---------------|---------|---------|----------|---------|
| Control-1     | 4.028   | 335.056 | 332      | 0.046   |
| Control-2     | 4.139   | 404.000 | 390      | 0.052   |
| Control-3     | 4.398   | 520.022 | 499      | 0.059   |
| BT36-1        | 3.771   | 343.070 | 342      | 0.109   |
| BT36-2        | 3.906   | 319.667 | 315      | 0.084   |
| BT36-3        | 4.011   | 604.920 | 558      | 0.103   |
| Cr(VI)-1      | 3.929   | 265.000 | 265      | 0.061   |
| Cr(VI)-2      | 3.592   | 480.923 | 452      | 0.129   |
| Cr(VI)-3      | 3.762   | 398.500 | 388      | 0.128   |
| BT36+Cr(VI)-1 | 3.783   | 273.125 | 273      | 0.089   |
| BT36+Cr(VI)-2 | 3.931   | 436.484 | 426      | 0.103   |
| BT36+Cr(VI)-3 | 3.783   | 280.667 | 279      | 0.098   |

105

106

107

108

109

110

111  
112  
113  
114  
115  
116  
117  
118  
119  
120  
121  
122  
123  
124  
125  
126  
127  
128  
129  
130  
131

**Supplementary Table 2.**  
Statistics of assembly result.

| Sample      | Seqs  | Seqs bases (bp) | N50 (bp) | N90 (bp) | Max (bp) | Min (bp) |
|-------------|-------|-----------------|----------|----------|----------|----------|
| BT36        | 14659 | 8174450         | 556      | 329      | 9575     | 300      |
| BT36+Cr(VI) | 78611 | 55770480        | 813      | 347      | 29842    | 300      |
| Control     | 87739 | 67965177        | 945      | 358      | 28959    | 300      |
| Cr(VI)      | 92503 | 61891539        | 738      | 344      | 28282    | 300      |

132  
133  
134  
135  
136  
137  
138  
139  
140  
141  
142

Seqs: The number of sequences in a transcript; Seq bases: The total sequence length of a transcript; N50(N90): Sequence the transcripts in order of length, scan the length of each sequence one by one from the largest to the smallest, and accumulate. When the accumulated value exceeds 50% (90%) of the total length of all sequences for the first time, the length value of the scanned sequence is N50 (N90); Compared with the average length of the sequence, N50 (N90) can more accurately represent the splicing effect of sequence. Max: The sequence length of the longest transcript; Min: The sequence length of the shortest transcript.

143  
144  
145  
146  
147  
148  
149  
150  
151  
152  
153  
154  
155  
156  
157  
158  
159  
160  
161  
162  
163  
164  
165  
166  
167

**Supplementary Table 3.**

Percentage of active bacteria in each sample at the phylum level. It is a default to combine all species whose expression abundance is less than 1% in all samples into others.

| <b>Percentage</b>     | <b>Control (%)</b> | <b>Cr(VI) (%)</b> | <b>BT36 (%)</b> | <b>BT36+Cr(VI) (%)</b> |
|-----------------------|--------------------|-------------------|-----------------|------------------------|
| <i>Firmicutes</i>     | 45.74              | 35.89             | 27.37           | 67.3                   |
| <i>Bacteroidetes</i>  | 46.65              | 55.8              | 24.26           | 23.89                  |
| <i>Proteobacteria</i> | 4.98               | 4.37              | 11.01           | 4.4                    |
| <i>Actinobacteria</i> | 0.36               | 0.55              | 0.2             | 2.26                   |
| Norank_d_Eukaryota    | 0.04               | 0.11              | 29.17           | 0.2                    |
| Norank_d_norank       | 0.38               | 1.17              | 2.37            | 0.98                   |
| Others                | 1.85               | 2.10              | 5.62            | 0.97                   |



168  
 169  
 170  
 171  
 172  
 173  
 174  
 175  
 176  
 177  
 178  
 179  
 180  
 181  
 182

**Supplementary Table 4.**

Primer used in this study.

| Primer name           | Sequence (5' - 3')     | PCR product size (bp) | Ref.       |
|-----------------------|------------------------|-----------------------|------------|
| Total bacteria, RT, F | GCAGGCCTAACACATGCAAGTC | 340                   | 1          |
| Total bacteria, RT, R | CTGCTGCCTCCCGTAGGAGT   |                       |            |
| BT 36, RT, F          | GGACTTGATAACGTACCCGC   | 449                   | 2          |
| BT 36, RT, R          | GTTCCGTCTTGCATTTGACC   |                       |            |
| MiSeq16SV4, 515F      | GTGCCAGCMGCCGCGGTAA    | 394                   | 3          |
| MiSeq16SV5, 909R      | CCCCGYCAATTCMTTTRAGT   |                       |            |
| comp53028, RT, F      | AGTCACGGATGTGAATCTGGC  | 384                   | This study |
| comp53028, RT, R      | GCCTTGCTGTAATCCGGTTC   |                       |            |
| comp53086, RT, F      | GTCTGCCTTCTTCGCGCTG    | 375                   | This study |
| comp53086, RT, R      | CATTCCGGTACCATTGTGGCA  |                       |            |
| comp53032, RT, F      | CGGTGCTCTGGTGGAAAGTT   | 279                   | This study |
| comp53032, RT, R      | AACACAGCCACCGGTTCTTC   |                       |            |
| comp53028, RT, F      | AGTCACGGATGTGAATCTGGC  | 384                   | This study |
| comp53028, RT, R      | GCCTTGCTGTAATCCGGTTC   |                       |            |
| comp53086, RT, F      | GTCTGCCTTCTTCGCGCTG    | 375                   | This study |
| comp53086, RT, R      | CATTCCGGTACCATTGTGGCA  |                       |            |
| comp53032, RT, F      | CGGTGCTCTGGTGGAAAGTT   | 279                   | This study |
| comp53032, RT, R      | AACACAGCCACCGGTTCTTC   |                       |            |

183  
 184

185 **Supplementary Table 5.**

186 The list of restriction enzymes sites of the DEGs interest.

187

| Gene name | Gene length (bp) | Restriction enzyme sites    |
|-----------|------------------|-----------------------------|
| comp53047 | 396              | EcoR I (192)/Hind III (173) |
| comp53095 | 258              | EcoR I (192)/Hind III (173) |
| comp24337 | 279              | EcoR I (192)/Hind III (173) |
| comp52516 | 261              | EcoR I (192)/Hind III (173) |
| comp53346 | 480              | EcoR I (192)/Hind III (173) |
| comp53299 | 375              | EcoR I (192)/Hind III (173) |
| comp53032 | 396              | EcoR I (192)/Hind III (173) |
| comp53087 | 279              | Nde I (238)/Sal I (179)     |
| comp51796 | 1104             | EcoR I (192)/Sal I (179)    |
| comp53431 | 507              | NdeI (238)/ XhoI (158)      |

188

189 **Supplementary Methods**

190 **Preparation of cell-free extracts**

191 BT36 was stationary inoculated in MRS at 37°C for overnight, then transferred  
192 into 100 mL fresh MRS at 2% ratio at 37°C for 18 h. The fermentation liquid was  
193 centrifuged at 8000 r/min for 10 min at 4°C to harvest the intact bacteria. The bacteria  
194 were washed 3 times with 0.02 M PBS (pH 7.2) and suspended in PBS at a  
195 concentration of 10<sup>10</sup> CFU mL<sup>-1</sup>. for the preparation of cell-free extracts, the bacterial  
196 suspension was ice bathed followed by ultrasonic disruption at 400 W for 10 s, 10 s  
197 intermittently and the whole process lasted 10 minutes. Then the cell debris was  
198 removed by centrifugation at 10 000 r/min, for 10 min at 4°C, and the resulting  
199 supernatant kept as the cell-free extract.

200

201 **Determination of scavenging ability of hydroxyl radical (. OH)**

202 The free radical scavenging capacity of BT36 was conducted according to the  
203 method reported <sup>4</sup>. 0.1 milliliter of cell-free extract, 0.4 ml of 0.02 M PBS, 0.1 mL of  
204 1 mM EDTA, 0.1 mL of 10 mM H<sub>2</sub>O<sub>2</sub>, 0.1 mL of 2 mM ascorbic acid, 0.1mL of 60  
205 mM 2-deoxy-D-ribose and 0.1 mL of 1mM FeCl<sub>3</sub> were mixed. After incubation at  
206 37°C water bath for 1 h, 0.1 mL of 20% (m/v) TCA and 1mL of 1.0% TBA were

207 added. After incubation at 100°C water bath for 15 minutes, the whole mixture was  
208 cooled down and measured at 365 nm. 1 mL cell-free extracts were replaced with the  
209 same volume of PBS and after the same incubation mentioned above, the data were  
210 expressed as A0. For the control sample, 1.1 mL PBS was added instated of adding  
211 1mL cell-free extracts and 0.1 mL deoxyribose, and the data were expressed as AC.  
212 Each group was set up with three repeats. The scavenging ability was defined as  
213 follows:

$$214 \quad \bullet \text{ OH scavenging rate (\%)} = 1 - \frac{AS-AC}{A0} \times 100\%$$

215 A0: absorbance of reagent blank reaction without sample;

216 AS: absorbance of reaction group containing sample and deoxyribose;

217 AC: absorbance of blank reaction group without deoxyribose.

218

### 219 **Determination of scavenging ability of 1,1-diphenyl-2-picrylhydrazyl (DPPH)**

220 The DPPH scavenging abilities were determined as previously described <sup>5</sup>. A mixture  
221 of 1.9 mL freshly prepared DPPH solution (0.12 mM) and 0.1 mL cell-free extracts  
222 were incubated for 30 min in the dark. The scavenged DPPH was analyzed by  
223 measuring the decrease in absorbance at 517 nm. Three repeats were set up for each  
224 group. The scavenging ability was defined as follows:

$$225 \quad \text{DPPH scavenging effect (\%)} = 1 - \frac{A-B}{A0} \times 100\%$$

226 A0: absorbance of DPPH (1.9 mL DPPH+0.1 mL 50% ethanol) without sample

227 addition

228 A: absorbance of the sample after reaction with DPPH (1.9 mL DPPH + 0.1 mL

229 sample)

230 B: absorbance of blank sample (1.9 mL 50% Ethanol + 0.1 mL Sample)

231

### 232 **Verification of DEGs by qRT-PCR.**

233 Total RNA was extracted from feces as described above. The concentration of total  
234 RNA samples was measured using NanoDrop 2000c Spectrophotometer from Thermo  
235 Scientific. The first strand cDNA was transcribed using PrimeScript™ RT reagent

236 kit with gDNA Eraser (TaKaRa, Japan), following the manufacturer protocol. PCR  
237 was done using a Real Time PCR System (Bio-rad, American) and SYBR Premix EX  
238 Taq™ (Tli RNaseH Plus), Bulk (TaKaRa, Japan). After cDNA synthesis, the  
239 concentrations of the first-strand samples were brought to 20 ng/ml, which were used  
240 as the template in qRT-PCR reactions. Cycling parameters included 95 °C for 30s, 95  
241 °C for 5s and then, 60 °C for 30s, 50 cycles of 95 °C for 5 s and 60 °C for 30 s, 95 °C  
242 10s, 65-95 °C 5s. Quantification of DEGs gene expression in fecal microbiome was  
243 based on the Relative Standard Curve method using the threshold cycle (Ct) values.  
244 The expression levels of mRNAs were normalized to 16S rRNA and calculated using  
245 the 2- $\Delta\Delta$ Ct method. All Primers were designed using NCBI (**Supplementary Table**  
246 **4**).

247

248

## 249 **Supplementary References**

250

- 251 1 Castillo, M. *et al.* Quantification of total bacteria, enterobacteria and lactobacilli populations  
252 in pig digesta by real-time PCR. *Veterinary Microbiology* **114**, 165-170,  
253 doi:<https://doi.org/10.1016/j.vetmic.2005.11.055> (2006).
- 254 2 Mora, D., Fortina, M. G., Parini, C. & Manachini, P. L. Identification of *Pediococcus acidilactici*  
255 and *Pediococcus pentosaceus* based on 16S rRNA and *ldhD* gene-targeted multiplex PCR  
256 analysis. *FEMS microbiology letters* **151**, 231-236, doi:10.1111/j.1574-6968.1997.tb12575.x  
257 (1997).
- 258 3 Tamaki, H. *et al.* Analysis of 16S rRNA Amplicon Sequencing Options on the Roche/454  
259 Next-Generation Titanium Sequencing Platform. *PLOS ONE* **6**, e25263,  
260 doi:10.1371/journal.pone.0025263 (2011).
- 261 4 Halliwell, B., Gutteridge, J. M. C. & Aruoma, O. I. The deoxyribose method: A simple  
262 "test-tube" assay for determination of rate constants for reactions of hydroxyl radicals.  
263 *Analytical Biochemistry* **165**, 215-219, doi:[https://doi.org/10.1016/0003-2697\(87\)90222-3](https://doi.org/10.1016/0003-2697(87)90222-3)  
264 (1987).
- 265 5 Chen, P. *et al.* Screening for potential new probiotic based on probiotic properties and  
266  $\alpha$ -glucosidase inhibitory activity. *Food Control* **35**, 65-72,  
267 doi:<https://doi.org/10.1016/j.foodcont.2013.06.027> (2014).

268
