# Supplementary material for: Tibet plateau probiotic mitigates chromate toxicity in mice by alleviating oxidative stress in gut microbiota
Source: PubMed Central journal article supplement (PMC7229148; doi:10.1038/s42003-020-0968-3), 2020-05-15
Supplement: 42003_2020_968_MOESM2_ESM.pdf [file 42003_2020_968_MOESM2_ESM.pdf]

## **Description of additional supplementary items**

### **Supplementary Data 1**

Relative expression of genes related to Cr(VI) reduction and antioxidation that were unchanged or upregulated in Cr(VI) and displayed a large fold change in the BT36 plus Cr(VI) sample. Only genes expressing  $\log_2 \text{FC} \geq 1.0$  were considered.

### **Supplementary Data 2**

Source data underlying the graphs in figures and supplementary Information as an excel file.
