# Supplementary material for: Tibet plateau probiotic mitigates chromate toxicity in mice by alleviating oxidative stress in gut microbiota
Source: PubMed Central journal article supplement (PMC7229148; doi:10.1038/s42003-020-0968-3), 2020-05-15
Supplement: 42003_2020_968_MOESM3_ESM.pdf [file 42003_2020_968_MOESM3_ESM.pdf]

| Gene ID                 | Samples (TPM) |         |         | Fold change | irP-value | FDR      |
|-------------------------|---------------|---------|---------|-------------|-----------|----------|
|                         | BT36+Cr(VI)   | Control | Cr(VI)  |             |           |          |
| <b>Reduction</b>        |               |         |         |             |           |          |
| comp52998_c0_seq        | 6357.047      | 0       | 0.9497  | 12.7086     | 8.34E-28  | 2.71E-24 |
| comp53032_c0_seq        | 2012.036      | 0       | 0       | 10.9744     | 2.00E-24  | 2.29E-21 |
| comp53086_c0_seq        | 1439.4555     | 0       | 0.2006  | 12.8091     | 1.49E-31  | 3.47E-27 |
| comp15415_c0_seq        | 1388.7344     | 0.1859  | 4.6896  | 8.2101      | 6.46E-22  | 3.92E-19 |
| comp53108_c0_seq        | 1361.5582     | 0       | 0.435   | 11.6121     | 1.40E-24  | 1.64E-21 |
| comp53172_c0_seq        | 820.2077      | 0       | 0       | 9.6798      | 9.33E-22  | 5.45E-19 |
| comp53183_c0_seq        | 593.2969      | 0       | 1.0101  | 9.2126      | 2.46E-22  | 1.69E-19 |
| comp53349_c0_seq        | 440.417       | 0       | 0.1675  | 11.3601     | 8.85E-24  | 8.63E-21 |
| comp53349_c0_seq        | 441.3075      | 0       | 0       | 8.7856      | 4.08E-24  | 4.28E-21 |
| comp53221_c0_seq        | 413.5606      | 36.138  | 83.1198 | 2.3148      | 3.73E-05  | 5.25E-04 |
| comp53404_c0_seq        | 388.5555      | 0       | 0       | 8.602       | 2.19E-22  | 1.55E-19 |
| comp53492_c0_seq        | 350.9119      | 0       | 0       | 8.455       | 7.63E-23  | 6.12E-20 |
| comp55818_c0_seq        | 294.7384      | 0       | 0       | 8.2033      | 2.53E-16  | 3.88E-14 |
| comp53616_c0_seq        | 241.6433      | 0       | 0       | 7.9167      | 1.45E-17  | 2.94E-15 |
| comp53541_c0_seq        | 230.1523      | 3.8874  | 51.4973 | 2.16        | 6.51E-05  | 8.53E-04 |
| comp67228_c0_seq        | 189.2899      | 4.0733  | 36.2718 | 2.3837      | 4.34E-05  | 6.06E-04 |
| comp53832_c0_seq        | 157.7314      | 1.5786  | 32.7598 | 2.2675      | 4.89E-05  | 6.65E-04 |
| comp53911_c0_seq        | 138.4604      | 0       | 0       | 7.1133      | 1.66E-17  | 3.33E-15 |
| comp15333_c0_seq        | 136.9528      | 0       | 0       | 7.0975      | 4.61E-21  | 2.22E-18 |
| comp54344_c0_seq        | 125.2589      | 15.8389 | 61.2375 | 1.0324      | 9.29E-13  | 7.13E-11 |
| <b>Antioxidation</b>    |               |         |         |             |           |          |
| comp52978_c0_seq        | 6170.3658     | 0.4838  | 0.5083  | 13.5675     | 1.97E-30  | 1.83E-26 |
| comp53028_c0_seq        | 1593.492      | 0       | 0       | 10.638      | 4.82E-25  | 6.23E-22 |
| comp65675_c0_seq        | 377.6587      | 1.3331  | 58.7155 | 2.6853      | 3.40E-06  | 6.49E-05 |
| comp12431_c0_seq        | 296.261644    | 2.2786  | 78.0226 | 1.9249      | 2.11E-04  | 2.36E-03 |
| comp53635_c0_seq        | 249.7676      | 5.8681  | 28.7589 | 3.1185      | 3.76E-07  | 9.09E-06 |
| comp12870_c0_seq        | 246.5176      | 0.9605  | 1.0165  | 7.9219      | 9.09E-16  | 1.22E-13 |
| comp53711_c0_seq        | 196.1017      | 69.8265 | 77.0592 | 1.3476      | 3.31E-03  | 2.25E-02 |
| comp53822_c0_seq        | 199.0934      | 3.7531  | 75.6673 | 1.3957      | 2.61E-03  | 1.90E-02 |
| comp10887_c0_seq        | 121.2359      | 28.7508 | 57.3308 | 1.0804      | 9.30E-03  | 4.97E-02 |
| comp53541_c0_seq        | 230.1523      | 3.8874  | 51.4974 | 2.16        | 6.51E-05  | 8.53E-04 |
| comp15505_c0_seq        | 183.3457      | 31.7524 | 45.7509 | 2.0027      | 1.55E-04  | 1.82E-03 |
| comp53861_c0_seq        | 144.6550877   | 2.8594  | 57.7457 | 1.3248      | 3.38E-03  | 2.30E-02 |
| comp51497_c0_seq        | 112.1898      | 22.6301 | 38.5    | 1.543       | 1.53E-03  | 1.21E-02 |
| comp10887_c0_seq        | 121.2359      | 28.7508 | 57.3308 | 1.0804      | 1.28E-16  | 2.09E-14 |
| <b>Unknown function</b> |               |         |         |             |           |          |
| comp53346_c0_seq        | 525.5945      | 0       | 0       | 9.0378      | 3.71E-20  | 1.40E-17 |
| comp53095_c0_seq        | 1263.5387     | 0       | 0       | 10.3033     | 3.06E-20  | 1.18E-17 |
| comp24337_c0_seq        | 909.9861      | 0       | 0       | 9.83        | 5.58E-19  | 1.55E-16 |
| comp53087_c0_seq        | 1160.4648     | 0       | 0       | 10.1805     | 2.20E-20  | 8.91E-18 |
| comp53032_c0_seq        | 2012.036      | 0       | 0       | 10.9744     | 2.00E-24  | 2.29E-21 |
| comp53431_c0_seq        | 336.5851      | 0       | 0       | 8.3948      | 1.91E-18  | 4.62E-16 |
| comp53299_c0_seq        | 407.1865      | 0       | 0.8095  | 9.7308      | 1.16E-16  | 1.92E-14 |
| comp52516_c2_seq        | 849.6734      | 0       | 0       | 8.9744      | 1.14E-24  | 1.39E-21 |
| comp53047_c0_seq        | 1353.387      | 0       | 1.5119  | 9.806       | 2.36E-21  | 1.23E-18 |
| comp51796_c0_seq        | 179.5021      | 0.812   | 4.2684  | 5.3942      | 4.14E-11  | 2.31E-09 |

## Species information

Thioredoxin [Faecalibaculum rodentium]  
Desulfoferrodoxin [Faecalibaculum rodentium]  
Pyruvate:ferredoxin (flavodoxin) oxidoreductase [Faecalibaculum rodentium]  
Pyruvate:ferredoxin (flavodoxin) oxidoreductase [Eubacterium plexicaudatum]  
Flavin reductase [Faecalibaculum rodentium]  
Thioredoxin [Faecalibaculum rodentium]  
FprA family A-type flavoprotein [Eubacterium plexicaudatum]  
FAD/NAD(P)-binding oxidoreductase [Faecalibaculum rodentium]  
FAD-dependent oxidoreductase [Faecalibaculum rodentium]  
Thioredoxin [Muribaculaceae bacterium DSM 103720]  
Thioredoxin-disulfide reductase [Faecalibaculum rodentium]  
FprA family A-type flavoprotein [Faecalibaculum rodentium]  
Desulfoferrodoxin [Eubacterium plexicaudatum]  
NAD(P)H-dependent oxidoreductase [Faecalibaculum rodentium]  
superoxide dismutase [Muribaculum intestinale]  
Thioredoxin [Muribaculum intestinale]  
MULTISPECIES: flavodoxin [unclassified muribaculaceae]  
Nitroreductase family protein [Eubacterium plexicaudatum]  
Nitroreductase family protein [Faecalibaculum rodentium]  
Thioredoxin [Duncaniella muris]

Rubryerythrin family protein [Faecalibaculum rodentium]  
Thiol peroxidase [Faecalibaculum rodentium]  
Rubredoxin [Muribaculum intestinale]  
Peroxiredoxin [Muribaculum intestinale]  
Rubryerythrin family protein [Muribaculum intestinale]  
NADH peroxidase [Lachnospiraceae bacterium A2]  
Peroxiredoxin [Muribaculaceae bacterium DSM 103720]  
Rubryerythrin [Muribaculum intestinale]  
Rubryerythrin family protein [Parabacteroides distasonis]  
Superoxide dismutase [Muribaculum intestinale]  
Superoxide dismutase [Duncaniella muris]  
MULTISPECIES: manganese catalase family protein [Bacteroidales]  
MULTISPECIES: Rubryerythrin family protein [Enterorhabdus]  
Rubryerythrin family protein [Parabacteroides distasonis]

hypothetical protein [Faecalibaculum rodentium]  
hypothetical protein AALO17\_17630 [Faecalibaculum rodentium]  
hypothetical protein [Faecalibaculum rodentium]  
hypothetical protein [Faecalibaculum rodentium]  
hypothetical protein BVX94\_00395 [bacterium B17]  
hypothetical protein BO223\_09690 [Faecalibaculum rodentium]  
hypothetical protein [Faecalibaculum rodentium]  
hypothetical protein [Faecalibaculum rodentium]  
hypothetical protein [Eubacterium plexicaudatum]  
Hypothetical protein [Lachnospiraceae bacterium 3-1]
